# Supplementary material for: Extensive Copy Number Variations in Admixed Indian Population of African Ancestry: Potential Involvement in Adaptation
Source: PubMed Central journal article supplement (PMC4986450; doi:10.1093/gbe/evu250), 2014-12-10
Supplement: supp_evu250_Supplementary_Information_GBE_R1.pdf [file supp_evu250_Supplementary_Information_GBE_R1.pdf]

**Text S1:** Method of computing ancestry information for CNVRs in OG specific to either of ancestral populations.

Assignment of ancestry for every CNVR marker

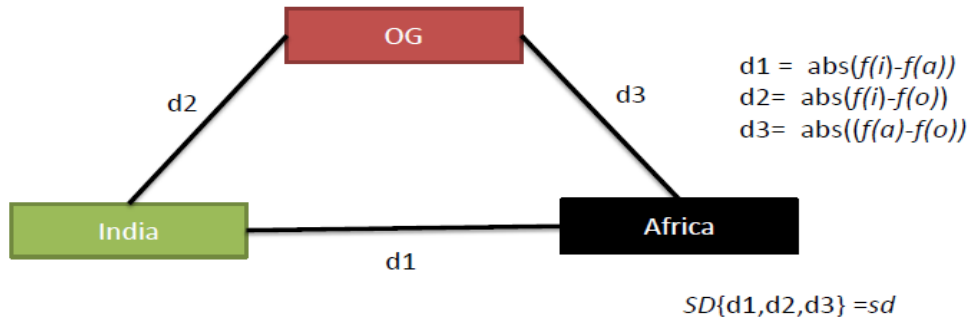

*Algorithm for defining ancestry*

```

If ((d1 < 0.05) & (sd >= 0.05))
{
OG equi-distant from both ancestors ;
}
elseif ((d1 > 0.05) & (d3 > d2) & (sd >= 0.05))
{
Assign Indian ancestry ;
}
else
{
Assign African Ancestry ;
}
}
    
```

Where

*abs* = absolute  
*f(i)* = Frequency in putative Indian ancestor(s)  
*f(a)* = Frequency in African ancestor(s)  
*f(o)* = Frequency in OG population  
*SD* = Standard Deviation

**Supplementary Figures:**

**Supplementary Fig.1:** Venn diagram showing overlap of Birdseye CNV calls with PennCNV and Affymetrix GTC.

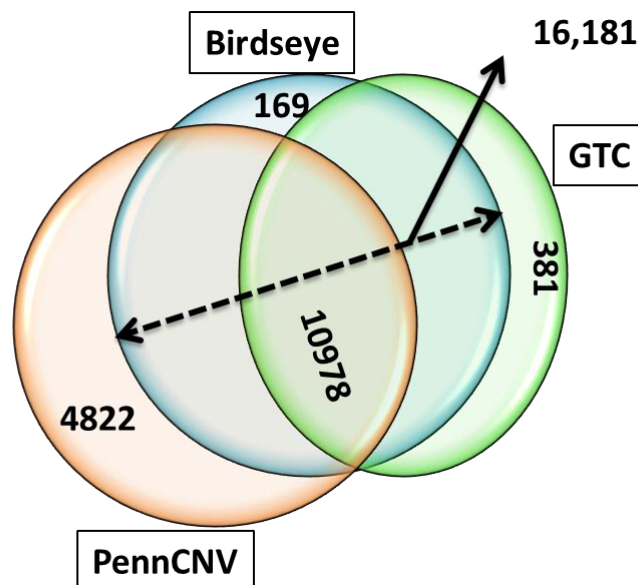

**Supplementary Fig.2:** Bar plot of CNV counts for deletion and duplications in different size bins in studied populations.

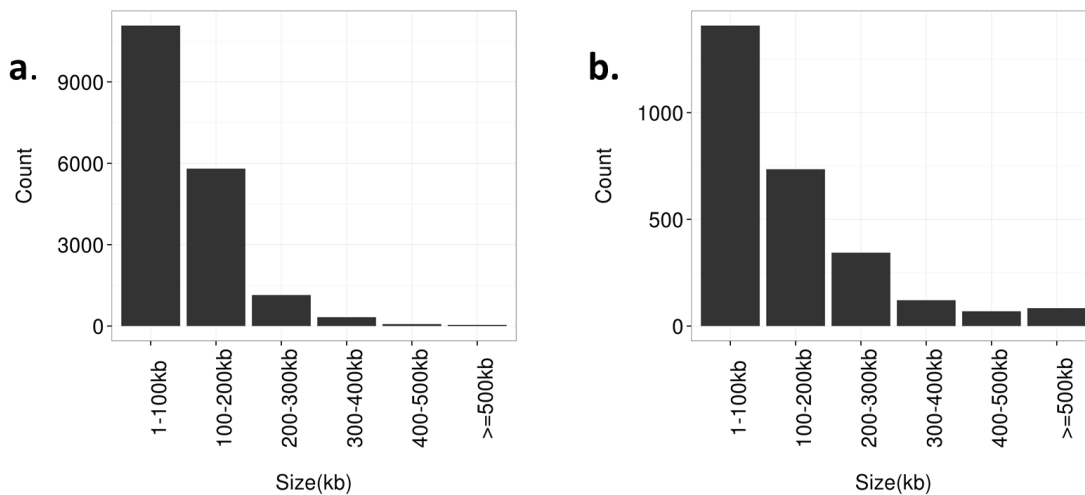

**Supplementary Fig.3:** Principle component analysis (PCA) of Indian and HapMap Samples based on genome-wide SNP markers.

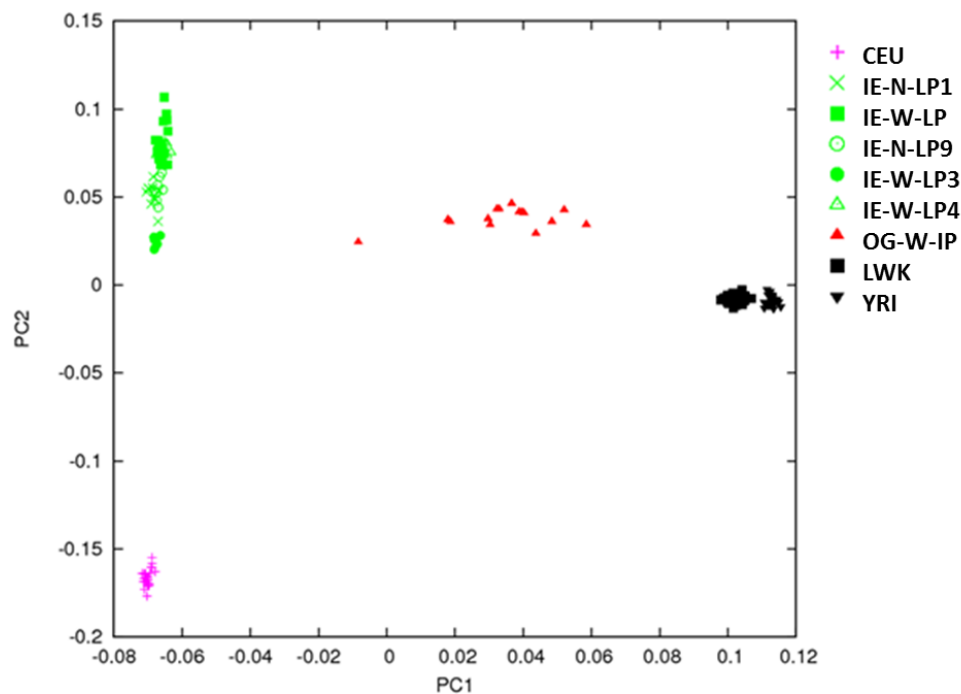

**Supplementary Fig.4:** Multiple dimensional scaling analysis (MDS) of Indian and HapMap Samples using canary CNV genotype calls.

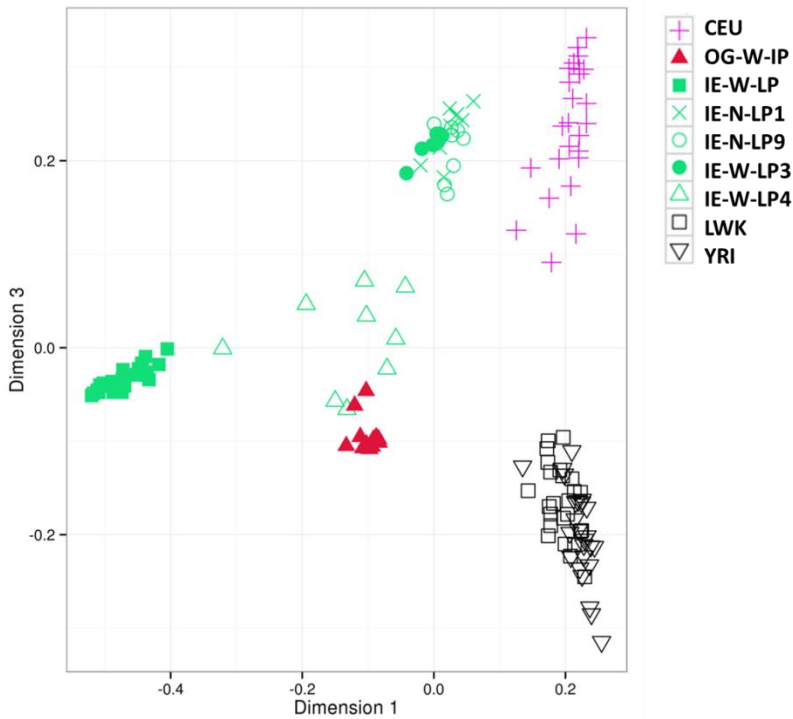

**Supplementary Fig.5:** Principle component analysis (PCA) of SNPs within CNV boundaries. PCA of SNPs within CNV boundaries further supports the stratification of CNV data.

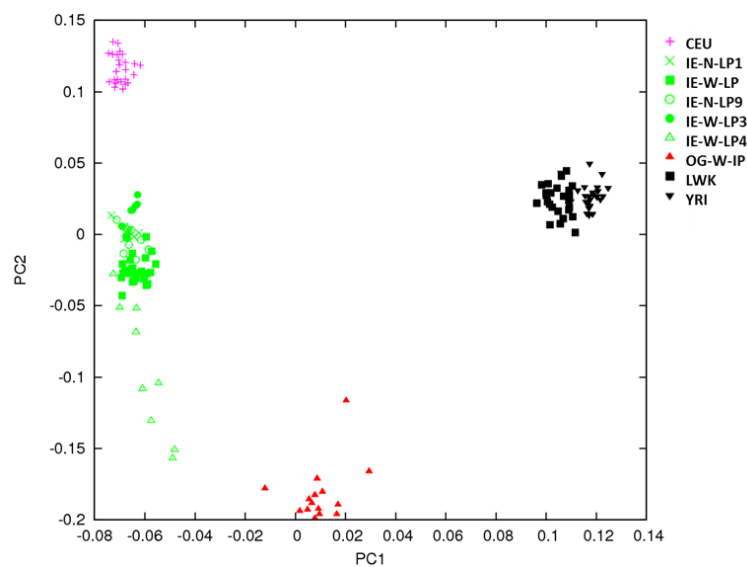

**Supplementary Fig.6:** Population stratification using two randomly selected datasets of genome-wide SNPs markers.

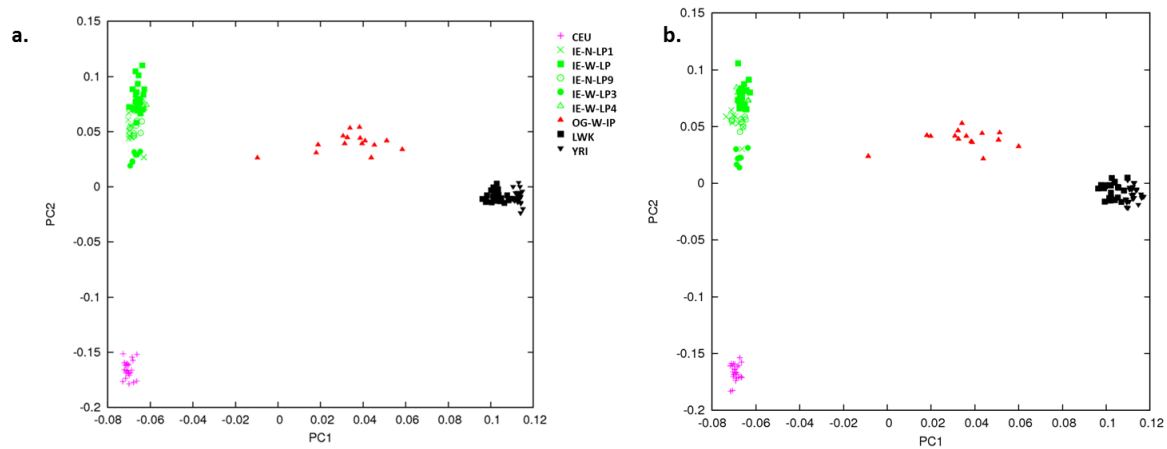

**Supplementary Fig.7:** Admixture proportions computed using CNVRs.

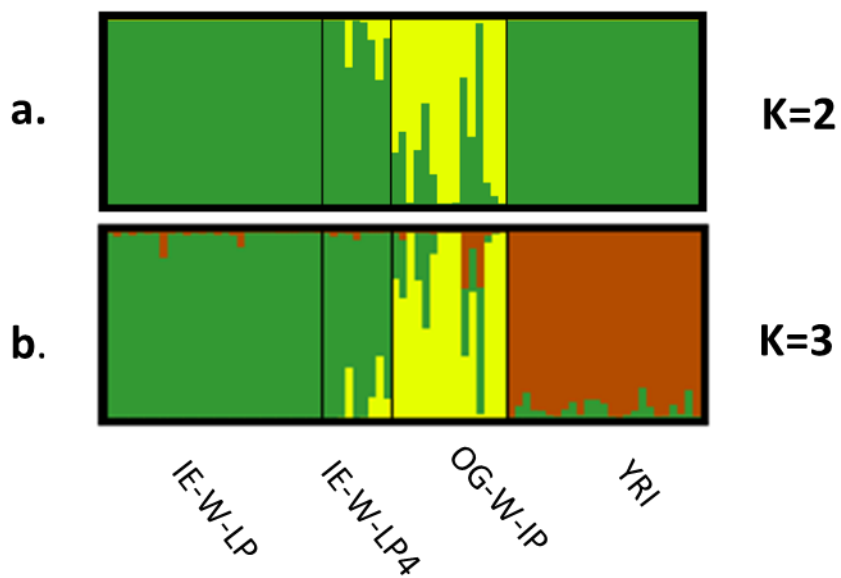

**Supplementary Fig.8:** Spectrum of CNV states in CNVRs unique to OG population. X-axis represents CNVRs and Y-axis represents individuals from each population.

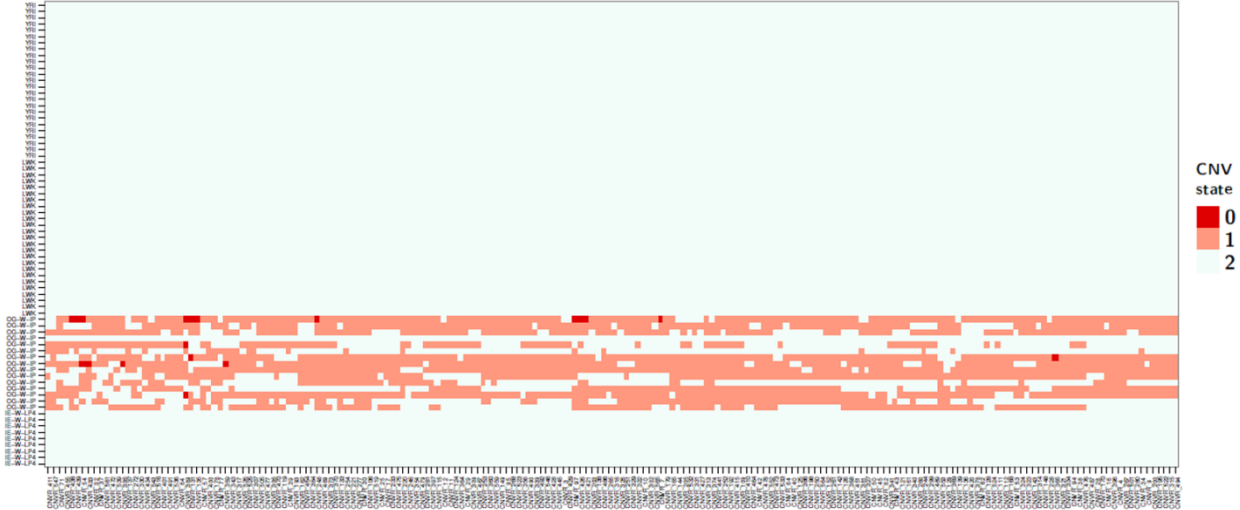

**Supplementary Fig.9:** Chromosomal distribution of OG specific genes enriched in different molecular processes.

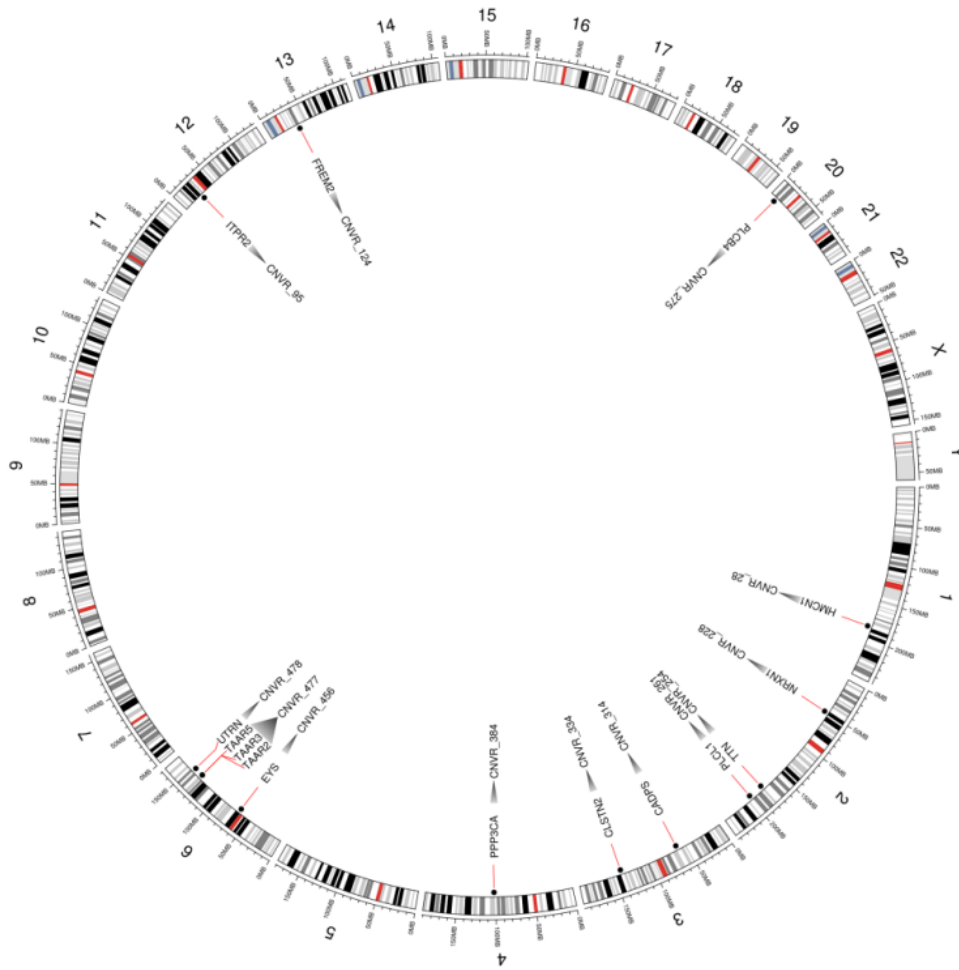

**Supplementary Tables:**

**Supplementary Table1:** Details of sample and population information used in the study. Yellow labeled represents samples from Indian populations and green represents from HapMap dataset.

| Sample                              | Population |
|-------------------------------------|------------|
| IGIB_SNP00048_(GenomeWideSNP_6).CEL | IE-N-LP1   |
| IGIB_SNP00055_(GenomeWideSNP_6).CEL | IE-N-LP1   |
| IGIB_SNP00060_(GenomeWideSNP_6).CEL | IE-N-LP1   |
| IGIB_SNP00061_(GenomeWideSNP_6).CEL | IE-N-LP1   |
| IGIB_SNP00064_(GenomeWideSNP_6).CEL | IE-N-LP1   |

|                                     |          |
|-------------------------------------|----------|
| IGIB_SNP00067_(GenomeWideSNP_6).CEL | IE-N-LP1 |
| IGIB_SNP00068_(GenomeWideSNP_6).CEL | IE-N-LP1 |
| IGIB_SNP00070_(GenomeWideSNP_6).CEL | IE-N-LP1 |
| IGIB_SNP0054_(GenomeWideSNP_6).CEL  | IE-N-LP1 |
| IGIB_SNP00036_(GenomeWideSNP_6).CEL | IE-N-LP9 |
| IGIB_SNP00007_(GenomeWideSNP_6).CEL | IE-N-LP9 |
| IGIB_SNP00010_(GenomeWideSNP_6).CEL | IE-N-LP9 |
| IGIB_SNP00023_(GenomeWideSNP_6).CEL | IE-N-LP9 |
| IGIB_SNP00031_(GenomeWideSNP_6).CEL | IE-N-LP9 |
| IGIB_SNP00035_(GenomeWideSNP_6).CEL | IE-N-LP9 |
| IGIB_SNP00041_(GenomeWideSNP_6).CEL | IE-N-LP9 |
| IGIB_SNP00042_(GenomeWideSNP_6).CEL | IE-N-LP9 |
| IGIB_SNP00107_(GenomeWideSNP_6).CEL | IE-N-LP9 |
| Sample_0010_(GenomeWideSNP_6).CEL   | IE-W-LP  |
| Sample_0025_(GenomeWideSNP_6).CEL   | IE-W-LP  |
| Sample_0026_(GenomeWideSNP_6).CEL   | IE-W-LP  |
| Sample_0030_(GenomeWideSNP_6).CEL   | IE-W-LP  |
| Sample_0052_(GenomeWideSNP_6).CEL   | IE-W-LP  |
| Sample_0070_(GenomeWideSNP_6).CEL   | IE-W-LP  |
| Sample_0088_(GenomeWideSNP_6).CEL   | IE-W-LP  |
| Sample_0143_(GenomeWideSNP_6).CEL   | IE-W-LP  |
| Sample_0146_(GenomeWideSNP_6).CEL   | IE-W-LP  |
| Sample_0149_(GenomeWideSNP_6).CEL   | IE-W-LP  |
| Sample_0158_(GenomeWideSNP_6).CEL   | IE-W-LP  |
| Sample_0164_(GenomeWideSNP_6).CEL   | IE-W-LP  |
| Sample_0014_(GenomeWideSNP_6).CEL   | IE-W-LP  |
| Sample_0020_(GenomeWideSNP_6).CEL   | IE-W-LP  |
| Sample_0051_(GenomeWideSNP_6).CEL   | IE-W-LP  |
| Sample_0054_(GenomeWideSNP_6).CEL   | IE-W-LP  |
| Sample_0055_(GenomeWideSNP_6).CEL   | IE-W-LP  |
| Sample_0066_(GenomeWideSNP_6).CEL   | IE-W-LP  |
| Sample_0103_(GenomeWideSNP_6).CEL   | IE-W-LP  |
| Sample_0177_(GenomeWideSNP_6).CEL   | IE-W-LP  |
| Sample_0181_(GenomeWideSNP_6).CEL   | IE-W-LP  |
| Sample_0186_(GenomeWideSNP_6).CEL   | IE-W-LP  |
| Sample_0268_(GenomeWideSNP_6).CEL   | IE-W-LP  |
| Sample_0289_(GenomeWideSNP_6).CEL   | IE-W-LP  |
| Sample_0291_(GenomeWideSNP_6).CEL   | IE-W-LP  |

|                                                         |          |
|---------------------------------------------------------|----------|
| Sample_0292_(GenomeWideSNP_6).CEL                       | IE-W-LP  |
| Sample_328_(GenomeWideSNP_6).CEL                        | IE-W-LP  |
| Sample_0367_(GenomeWideSNP_6).CEL                       | IE-W-LP  |
| IGIB_SNP02621_(GenomeWideSNP_6).CEL                     | IE-W-LP3 |
| IGIB_SNP02627_(GenomeWideSNP_6).CEL                     | IE-W-LP3 |
| IGIB_SNP02632_(GenomeWideSNP_6).CEL                     | IE-W-LP3 |
| IGIB_SNP02633_(GenomeWideSNP_6).CEL                     | IE-W-LP3 |
| IGIB_SNP02637_170510_(GenomeWideSNP_6).CEL              | IE-W-LP3 |
| IGIB_SNP02638_170510_(GenomeWideSNP_6).CEL              | IE-W-LP3 |
| IGIB_SNP02639_170510_(GenomeWideSNP_6).CEL              | IE-W-LP3 |
| IGIB_SNP_8538_(GenomeWideSNP_6).CEL                     | IE-W-LP4 |
| IGIB_SNP_8540_(GenomeWideSNP_6).CEL                     | IE-W-LP4 |
| IGIB_SNP_8541_(GenomeWideSNP_6).CEL                     | IE-W-LP4 |
| IGIB_SNP-8543_(GenomeWideSNP_6).CEL                     | IE-W-LP4 |
| IGIB_SNP-8544_(GenomeWideSNP_6).CEL                     | IE-W-LP4 |
| IGIB_SNP-8545_(GenomeWideSNP_6).CEL                     | IE-W-LP4 |
| IGIB_SNP-8546_(GenomeWideSNP_6).CEL                     | IE-W-LP4 |
| IGIB_SNP-8547_(GenomeWideSNP_6).CEL                     | IE-W-LP4 |
| IGIB_SNP-8548_(GenomeWideSNP_6).CEL                     | IE-W-LP4 |
| IGIB_SNP_8489_(GenomeWideSNP_6).CEL                     | OG-W-IP  |
| IGIB-SNP-8490_(GenomeWideSNP_6).CEL                     | OG-W-IP  |
| IGIB-SNP-8491_(GenomeWideSNP_6).CEL                     | OG-W-IP  |
| IGIB_SNP_8492_(GenomeWideSNP_6).CEL                     | OG-W-IP  |
| IGIB_SNP_8495_(GenomeWideSNP_6).CEL                     | OG-W-IP  |
| IGIB_SNP_8497_(GenomeWideSNP_6).CEL                     | OG-W-IP  |
| IGIB-SNP-8498_(GenomeWideSNP_6).CEL                     | OG-W-IP  |
| IGIB-SNP-8499_(GenomeWideSNP_6).CEL                     | OG-W-IP  |
| IGIB_SNP_8502_(GenomeWideSNP_6).CEL                     | OG-W-IP  |
| IGIB_SNP_8503_(GenomeWideSNP_6).CEL                     | OG-W-IP  |
| IGIB_SNP_8504_(GenomeWideSNP_6).CEL                     | OG-W-IP  |
| IGIB_SNP_8506_(GenomeWideSNP_6).CEL                     | OG-W-IP  |
| IGIB_SNP_8507_(GenomeWideSNP_6).CEL                     | OG-W-IP  |
| IGIB_SNP_8508_(GenomeWideSNP_6).CEL                     | OG-W-IP  |
| IGIB_SNP_8539_(GenomeWideSNP_6).CEL                     | OG-W-IP  |
| CUPID_p_HapMapPT06_GenomeWideSNP_6_H09_183740.CEL       | CEU      |
| CUPID_p_HapMapPT06_GenomeWideSNP_6_H11_183772.CEL       | CEU      |
| CUPID_p_HapMapPT06_GenomeWideSNP_6_H12_183788.CEL       | CEU      |
| GIGAS_g_GAINmixHapMapAffy2_GenomeWideEx_6_A05_31282.CEL | CEU      |



|                                                          |     |
|----------------------------------------------------------|-----|
| GIGAS_g_GAINmixHapMapAffy2_GenomeWideEx_6_A06_31298.CEL  | CEU |
| GIGAS_g_GAINmixHapMapAffy2_GenomeWideEx_6_A07_31314.CEL  | CEU |
| GIGAS_g_GAINmixHapMapAffy2_GenomeWideEx_6_B05_31284.CEL  | CEU |
| GIGAS_g_GAINmixHapMapAffy2_GenomeWideEx_6_B08_31332.CEL  | CEU |
| GIGAS_g_GAINmixHapMapAffy2_GenomeWideEx_6_C05_31286.CEL  | CEU |
| GIGAS_g_GAINmixHapMapAffy2_GenomeWideEx_6_C06_31302.CEL  | CEU |
| GIGAS_g_GAINmixHapMapAffy2_GenomeWideEx_6_C07_31318.CEL  | CEU |
| GIGAS_g_GAINmixHapMapAffy2_GenomeWideEx_6_C08_31334.CEL  | CEU |
| GIGAS_g_GAINmixHapMapAffy2_GenomeWideEx_6_D07_31320.CEL  | CEU |
| GIGAS_g_GAINmixHapMapAffy2_GenomeWideEx_6_D08_31336.CEL  | CEU |
| GIGAS_g_GAINmixHapMapAffy2_GenomeWideEx_6_E06_31306.CEL  | CEU |
| GIGAS_g_GAINmixHapMapAffy2_GenomeWideEx_6_E08_31338.CEL  | CEU |
| GIGAS_g_GAINmixHapMapAffy2_GenomeWideEx_6_F05_31292.CEL  | CEU |
| GIGAS_g_GAINmixHapMapAffy2_GenomeWideEx_6_G05_31294.CEL  | CEU |
| GIGAS_g_GAINmixHapMapAffy2_GenomeWideEx_6_G06_31310.CEL  | CEU |
| GIGAS_g_GAINmixHapMapAffy2_GenomeWideEx_6_G07_31326.CEL  | CEU |
| GIGAS_g_GAINmixHapMapAffy2_GenomeWideEx_6_G08_31342.CEL  | CEU |
| GIGAS_g_GAINmixHapMapAffy2_GenomeWideEx_6_H06_31312.CEL  | CEU |
| GIGAS_g_GAINmixHapMapAffy2_GenomeWideEx_6_H08_31344.CEL  | CEU |
| NIGHS_p_HapMap_PhIII_Redo_GenomeWideSNP_6_A01_196482.CEL | CEU |
| NIGHS_p_HapMap_PhIII_Redo_GenomeWideSNP_6_A04_196488.CEL | CEU |
| NIGHS_p_HapMap_PhIII_Redo_GenomeWideSNP_6_G06_196636.CEL | LWK |
| NIGHS_p_HapMap_PhIII_Redo_GenomeWideSNP_6_G07_196638.CEL | LWK |
| NIGHS_p_HapMap_PhIII_Redo_GenomeWideSNP_6_G09_196642.CEL | LWK |
| NIGHS_p_HapMap_PhIII_Redo_GenomeWideSNP_6_G10_196644.CEL | LWK |
| NIGHS_p_HapMap_PhIII_Redo_GenomeWideSNP_6_G11_196646.CEL | LWK |
| POSIT_p_HapMapv12_GenomeWideSNP_6_A01_181564.CEL         | LWK |
| POSIT_p_HapMapv12_GenomeWideSNP_6_A03_181596.CEL         | LWK |
| POSIT_p_HapMapv12_GenomeWideSNP_6_A05_181628.CEL         | LWK |
| POSIT_p_HapMapv12_GenomeWideSNP_6_A08_181676.CEL         | LWK |
| POSIT_p_HapMapv12_GenomeWideSNP_6_A09_181692.CEL         | LWK |
| POSIT_p_HapMapv12_GenomeWideSNP_6_A12_181740.CEL         | LWK |
| POSIT_p_HapMapv12_GenomeWideSNP_6_B01_181566.CEL         | LWK |
| POSIT_p_HapMapv12_GenomeWideSNP_6_B03_181598.CEL         | LWK |
| POSIT_p_HapMapv12_GenomeWideSNP_6_B04_181614.CEL         | LWK |
| POSIT_p_HapMapv12_GenomeWideSNP_6_B05_181630.CEL         | LWK |
| POSIT_p_HapMapv12_GenomeWideSNP_6_B06_181646.CEL         | LWK |
| POSIT_p_HapMapv12_GenomeWideSNP_6_B10_181710.CEL         | LWK |

|                                                         |     |
|---------------------------------------------------------|-----|
| POSIT_p_HapMapv12_GenomeWideSNP_6_C01_181568.CEL        | LWK |
| POSIT_p_HapMapv12_GenomeWideSNP_6_C02_181584.CEL        | LWK |
| POSIT_p_HapMapv12_GenomeWideSNP_6_C03_181600.CEL        | LWK |
| POSIT_p_HapMapv12_GenomeWideSNP_6_C04_181616.CEL        | LWK |
| POSIT_p_HapMapv12_GenomeWideSNP_6_C07_181664.CEL        | LWK |
| POSIT_p_HapMapv12_GenomeWideSNP_6_C12_181744.CEL        | LWK |
| POSIT_p_HapMapv12_GenomeWideSNP_6_D01_181570.CEL        | LWK |
| POSIT_p_HapMapv12_GenomeWideSNP_6_D02_181586.CEL        | LWK |
| GIGAS_g_GAINmixHapMapAffy2_GenomeWideEx_6_A01_31218.CEL | YRI |
| GIGAS_g_GAINmixHapMapAffy2_GenomeWideEx_6_A03_31250.CEL | YRI |
| GIGAS_g_GAINmixHapMapAffy2_GenomeWideEx_6_A04_31266.CEL | YRI |
| GIGAS_g_GAINmixHapMapAffy2_GenomeWideEx_6_B02_31236.CEL | YRI |
| GIGAS_g_GAINmixHapMapAffy2_GenomeWideEx_6_B03_31252.CEL | YRI |
| GIGAS_g_GAINmixHapMapAffy2_GenomeWideEx_6_C01_31222.CEL | YRI |
| GIGAS_g_GAINmixHapMapAffy2_GenomeWideEx_6_C04_31270.CEL | YRI |
| GIGAS_g_GAINmixHapMapAffy2_GenomeWideEx_6_D02_31240.CEL | YRI |
| GIGAS_g_GAINmixHapMapAffy2_GenomeWideEx_6_D03_31256.CEL | YRI |
| GIGAS_g_GAINmixHapMapAffy2_GenomeWideEx_6_E01_31226.CEL | YRI |
| GIGAS_g_GAINmixHapMapAffy2_GenomeWideEx_6_E02_31242.CEL | YRI |
| GIGAS_g_GAINmixHapMapAffy2_GenomeWideEx_6_E03_31258.CEL | YRI |
| GIGAS_g_GAINmixHapMapAffy2_GenomeWideEx_6_E04_31274.CEL | YRI |
| GIGAS_g_GAINmixHapMapAffy2_GenomeWideEx_6_F02_31244.CEL | YRI |
| GIGAS_g_GAINmixHapMapAffy2_GenomeWideEx_6_F04_31606.CEL | YRI |
| GIGAS_g_GAINmixHapMapAffy2_GenomeWideEx_6_G01_31230.CEL | YRI |
| GIGAS_g_GAINmixHapMapAffy2_GenomeWideEx_6_G03_31262.CEL | YRI |
| GIGAS_g_GAINmixHapMapAffy2_GenomeWideEx_6_G04_31278.CEL | YRI |
| GIGAS_g_GAINmixHapMapAffy2_GenomeWideEx_6_H02_31248.CEL | YRI |
| GIGAS_g_GAINmixHapMapAffy2_GenomeWideEx_6_H03_31264.CEL | YRI |
| GIGAS_g_GAINmixHapMapAffy2_GenomeWideEx_6_H04_31280.CEL | YRI |
| SCALE_g_GAINmixHapMapAffy1_GenomeWideEx_6_A09_30950.CEL | YRI |
| SCALE_g_GAINmixHapMapAffy1_GenomeWideEx_6_A11_30982.CEL | YRI |
| SCALE_g_GAINmixHapMapAffy1_GenomeWideEx_6_A12_30998.CEL | YRI |
| SCALE_g_GAINmixHapMapAffy1_GenomeWideEx_6_B09_30952.CEL | YRI |

**Supplementary Table 2:** Summary statistics of CNV calls identified using Birdseye module in studied populations.

| CNV Statistics                                    |               |               |               |               |               |               |               |               |                  |
|---------------------------------------------------|---------------|---------------|---------------|---------------|---------------|---------------|---------------|---------------|------------------|
| Population                                        | CEU           | YRI           | LWK           | IE-W-LP       | IE-N-LP1      | IE-N-LP9      | IE-W-LP3      | IE-W-LP4      | OG-W-IP1         |
| Sample_Size                                       | 25            | 25            | 25            | 28            | 9             | 9             | 7             | 9             | 15               |
| Total CNV Calls                                   | 1323          | 1381          | 969           | 1099          | 543           | 653           | 310           | 856           | 12889            |
| Deletions Count                                   | 1058          | 1061          | 752           | 849           | 381           | 585           | 239           | 714           | 11853            |
| Duplications Count                                | 265           | 320           | 217           | 241           | 162           | 68            | 71            | 142           | 1036             |
| Average CNV Count Per Individual                  | 52.92         | 55.24         | 38.76         | 39.25         | 60.33         | 72.56         | 44.29         | 95.11         | 859.27           |
| Average CNV Count Per Individual for Deletions    | 42.32         | 42.44         | 30.08         | 30.32         | 37.5          | 65            | 34.14         | 79.33         | 790.2            |
| Average CNV Count Per Individual for Duplications | 10.6          | 12.8          | 8.68          | 8.93          | 18            | 7.56          | 10.14         | 15.78         | 69.07            |
| Total Size                                        | 83,797,690.00 | 79,620,667.00 | 65,977,811.00 | 64,569,219.00 | 34,044,675.00 | 33,880,156.00 | 18,123,223.00 | 58,257,235.00 | 1,628,889,610.00 |
| Average Size                                      | 63,339.15     | 57,654.36     | 68,088.56     | 58,752.70     | 62,697.38     | 51,883.85     | 58,462.01     | 68,057.52     | 126,378.28       |
| Average Size Del                                  | 43,452.77     | 40,246.41     | 47,362.16     | 51,032.06     | 36,770.70     | 44,565.28     | 45,926.28     | 62,698.61     | 122,174.00       |
| Average size Dup                                  | 142,828.96    | 115,372.57    | 139,914.58    | 84,972.00     | 123,673.07    | 114,845.07    | 100,659.73    | 95,003.01     | 174,479.86       |
| Genome fraction*                                  | 0.03          | 0.03          | 0.02          | 0.02          | 0.01          | 0.01          | 0.01          | 0.02          | 0.57             |

**Supplementary Table 3:** Annotated Copy Number Variable Regions (CNVRs) constructed using Indian, OG and HapMap Samples.

| CNVR     | Chr | Start    | Stop     | Annotation            |
|----------|-----|----------|----------|-----------------------|
| CNVR_427 | 5   | 1.07E+08 | 1.07E+08 | EFNA5                 |
| CNVR_434 | 5   | 1.23E+08 | 1.23E+08 | Non-Genic             |
| CNVR_393 | 4   | 1.28E+08 | 1.28E+08 | Non-Genic             |
| CNVR_401 | 4   | 1.51E+08 | 1.51E+08 | Non-Genic             |
| CNVR_364 | 4   | 26878620 | 26940536 | Non-Genic             |
| CNVR_121 | 13  | 36887578 | 36947378 | Non-Genic             |
| CNVR_497 | 7   | 89459389 | 89538574 | Non-Genic             |
| CNVR_263 | 2   | 2.06E+08 | 2.06E+08 | PARD3B                |
| CNVR_346 | 3   | 1.75E+08 | 1.75E+08 | NLGN1                 |
| CNVR_339 | 3   | 1.61E+08 | 1.61E+08 | SCHIP1,IQCJ-SCHIP1    |
| CNVR_228 | 2   | 50670383 | 50735657 | NRXN1                 |
| CNVR_19  | 1   | 1.11E+08 | 1.11E+08 | Non-Genic             |
| CNVR_414 | 5   | 46282270 | 46313969 | Non-Genic             |
| CNVR_205 | 18  | 61059475 | 61181260 | Non-Genic             |
| CNVR_309 | 3   | 36284733 | 36312767 | Non-Genic             |
| CNVR_71  | 11  | 37021958 | 37103169 | Non-Genic             |
| CNVR_56  | 11  | 4206589  | 4276290  | Non-Genic             |
| CNVR_296 | 3   | 7331888  | 7461254  | GRM7                  |
| CNVR_108 | 12  | 57404846 | 57474908 | Non-Genic             |
| CNVR_92  | 12  | 9521823  | 9622904  | Non-Genic             |
| CNVR_174 | 16  | 22465433 | 22612021 | LOC653786             |
| CNVR_103 | 12  | 38593865 | 38601020 | SLC2A13               |
| CNVR_433 | 5   | 1.17E+08 | 1.17E+08 | LOC102467224          |
| CNVR_465 | 6   | 82220580 | 82316176 | Non-Genic             |
| CNVR_255 | 2   | 1.8E+08  | 1.8E+08  | ZNF385B               |
| CNVR_141 | 14  | 25829046 | 25884384 | Non-Genic             |
| CNVR_513 | 8   | 5586134  | 5591903  | Non-Genic             |
| CNVR_135 | 13  | 90286267 | 90314977 | Non-Genic             |
| CNVR_528 | 8   | 40302954 | 40308668 | Non-Genic             |
| CNVR_301 | 3   | 22217443 | 22311827 | Non-Genic             |
| CNVR_153 | 14  | 85497507 | 85578803 | Non-Genic             |
| CNVR_159 | 15  | 28370728 | 28536721 | LOC101059918,CHRFAM7A |
| CNVR_86  | 11  | 1.05E+08 | 1.05E+08 | GRIA4                 |
| CNVR_356 | 4   | 16705709 | 16748841 | Non-Genic             |
| CNVR_179 | 16  | 74664818 | 74775685 | Non-Genic             |
| CNVR_182 | 17  | 6047210  | 6073171  | Non-Genic             |
| CNVR_220 | 2   | 6594530  | 6708334  | MIR7515               |

|          |    |          |          |                                                                                        |
|----------|----|----------|----------|----------------------------------------------------------------------------------------|
| CNVR_529 | 8  | 61109299 | 61170422 | Non-Genic                                                                              |
| CNVR_5   | 1  | 58136669 | 58167387 | DAB1                                                                                   |
| CNVR_127 | 13 | 56656271 | 56676381 | Non-Genic                                                                              |
| CNVR_47  | 10 | 54584957 | 54609159 | Non-Genic                                                                              |
| CNVR_372 | 4  | 65502101 | 65556996 | LOC401134                                                                              |
| CNVR_20  | 1  | 1.12E+08 | 1.12E+08 | Non-Genic                                                                              |
| CNVR_304 | 3  | 30398317 | 30406630 | Non-Genic                                                                              |
| CNVR_535 | 8  | 93572450 | 93636387 | Non-Genic                                                                              |
| CNVR_247 | 2  | 1.45E+08 | 1.46E+08 | TEX41                                                                                  |
| CNVR_70  | 11 | 30671463 | 30731101 | Non-Genic                                                                              |
| CNVR_67  | 11 | 25565122 | 25581317 | Non-Genic                                                                              |
| CNVR_60  | 11 | 5817777  | 5844513  | OR52E6,OR52E8                                                                          |
| CNVR_555 | 9  | 43523459 | 43740182 | SPATA31A6,CNTNAP3B                                                                     |
| CNVR_415 | 5  | 51948048 | 52076046 | Non-Genic                                                                              |
| CNVR_478 | 6  | 1.45E+08 | 1.45E+08 | UTRN                                                                                   |
| CNVR_564 | 9  | 1.18E+08 | 1.18E+08 | LINC00474                                                                              |
| CNVR_447 | 5  | 1.8E+08  | 1.8E+08  | BTNL3                                                                                  |
| CNVR_455 | 6  | 66139833 | 66162495 | EYS                                                                                    |
| CNVR_397 | 4  | 1.44E+08 | 1.44E+08 | INPP4B                                                                                 |
| CNVR_374 | 4  | 66268199 | 66377522 | Non-Genic                                                                              |
| CNVR_287 | 22 | 21361351 | 21553233 | MIR650                                                                                 |
| CNVR_54  | 10 | 1.07E+08 | 1.07E+08 | SORCS3                                                                                 |
| CNVR_172 | 16 | 19853151 | 19874863 | Non-Genic                                                                              |
| CNVR_23  | 1  | 1.51E+08 | 1.51E+08 | Non-Genic                                                                              |
| CNVR_546 | 9  | 7488222  | 7506684  | Non-Genic                                                                              |
| CNVR_276 | 20 | 10968105 | 11140548 | Non-Genic                                                                              |
| CNVR_460 | 6  | 77070276 | 77084501 | Non-Genic                                                                              |
| CNVR_193 | 18 | 23405787 | 23475185 | Non-Genic                                                                              |
| CNVR_363 | 4  | 21102565 | 21166574 | KCNIP4                                                                                 |
| CNVR_264 | 2  | 2.08E+08 | 2.08E+08 | Non-Genic                                                                              |
| CNVR_226 | 2  | 40779595 | 40802273 | Non-Genic                                                                              |
| CNVR_214 | 19 | 48386001 | 48389173 | PSG4                                                                                   |
| CNVR_522 | 8  | 32255842 | 32359504 | NRG1                                                                                   |
| CNVR_302 | 3  | 30157379 | 30258393 | Non-Genic                                                                              |
| CNVR_122 | 13 | 36970036 | 36982757 | Non-Genic                                                                              |
| CNVR_239 | 2  | 1.15E+08 | 1.15E+08 | DPP10                                                                                  |
| CNVR_468 | 6  | 87463359 | 87475703 | Non-Genic                                                                              |
| CNVR_269 | 2  | 2.27E+08 | 2.27E+08 | Non-Genic                                                                              |
| CNVR_166 | 15 | 85921135 | 86001598 | LINC00052                                                                              |
| CNVR_154 | 15 | 18652835 | 19488342 | CHEK2P2,LOC646214,CXADRP2,GOLGA8CP,POTEB,POTEB<br>2,CT60,GOLGA6L6,NBEAP1,NF1P2,HERC2P3 |
| CNVR_503 | 7  | 1.21E+08 | 1.21E+08 | Non-Genic                                                                              |

|          |    |          |          |                                                           |
|----------|----|----------|----------|-----------------------------------------------------------|
| CNVR_384 | 4  | 1.02E+08 | 1.02E+08 | PPP3CA                                                    |
| CNVR_396 | 4  | 1.43E+08 | 1.43E+08 | INPP4B                                                    |
| CNVR_536 | 8  | 1.07E+08 | 1.07E+08 | ZFPM2                                                     |
| CNVR_394 | 4  | 1.32E+08 | 1.32E+08 | Non-Genic                                                 |
| CNVR_353 | 4  | 11951207 | 12006650 | Non-Genic                                                 |
| CNVR_323 | 3  | 74602074 | 74656916 | CNTN3                                                     |
| CNVR_446 | 5  | 1.79E+08 | 1.79E+08 | Non-Genic                                                 |
| CNVR_402 | 4  | 1.53E+08 | 1.53E+08 | Non-Genic                                                 |
| CNVR_343 | 3  | 1.65E+08 | 1.65E+08 | Non-Genic                                                 |
| CNVR_110 | 12 | 66237533 | 66282948 | LOC100507175                                              |
| CNVR_482 | 7  | 138342   | 166359   | Non-Genic                                                 |
| CNVR_426 | 5  | 1.06E+08 | 1.06E+08 | LOC102467213                                              |
| CNVR_416 | 5  | 57361784 | 57369290 | Non-Genic                                                 |
| CNVR_64  | 11 | 21213700 | 21215454 | NELL1                                                     |
| CNVR_107 | 12 | 57017938 | 57045691 | Non-Genic                                                 |
| CNVR_494 | 7  | 77873369 | 77929599 | MAGI2                                                     |
| CNVR_231 | 2  | 58911738 | 59057679 | LINC01122                                                 |
| CNVR_104 | 12 | 39982173 | 40103127 | PDZRN4                                                    |
| CNVR_119 | 13 | 25088798 | 25160677 | ATP8A2                                                    |
| CNVR_57  | 11 | 4482950  | 4515860  | Non-Genic                                                 |
| CNVR_545 | 9  | 582889   | 596961   | KANK1                                                     |
| CNVR_327 | 3  | 1.01E+08 | 1.01E+08 | Non-Genic                                                 |
| CNVR_241 | 2  | 1.23E+08 | 1.23E+08 | Non-Genic                                                 |
| CNVR_18  | 1  | 1.1E+08  | 1.1E+08  | GSTM1,GSTM2                                               |
| CNVR_520 | 8  | 24412117 | 24467571 | ADAM7                                                     |
| CNVR_78  | 11 | 80951189 | 81093084 | Non-Genic                                                 |
| CNVR_181 | 16 | 81131034 | 81140525 | Non-Genic                                                 |
| CNVR_567 | 9  | 1.21E+08 | 1.21E+08 | Non-Genic                                                 |
| CNVR_464 | 6  | 81705925 | 81748305 | Non-Genic                                                 |
| CNVR_487 | 7  | 11314044 | 11390928 | THSD7A                                                    |
| CNVR_514 | 8  | 12278011 | 12402552 | LOC649352,DEFB109P1,FAM90A25P,FAM66A,FAM86B2,LOC100506990 |
| CNVR_330 | 3  | 1.17E+08 | 1.17E+08 | Non-Genic                                                 |
| CNVR_270 | 20 | 1505190  | 1508999  | SIRPB1                                                    |
| CNVR_158 | 15 | 25593092 | 25601401 | Non-Genic                                                 |
| CNVR_413 | 5  | 46197279 | 46227641 | Non-Genic                                                 |
| CNVR_377 | 4  | 70155839 | 70298973 | UGT2B28                                                   |
| CNVR_556 | 9  | 44667855 | 44795733 | Non-Genic                                                 |
| CNVR_432 | 5  | 1.16E+08 | 1.16E+08 | COMMD10                                                   |
| CNVR_461 | 6  | 77496587 | 77509523 | Non-Genic                                                 |
| CNVR_310 | 3  | 46776821 | 46824593 | Non-Genic                                                 |
| CNVR_124 | 13 | 38224255 | 38326381 | FREM2                                                     |

|          |    |          |          |                                                                                           |
|----------|----|----------|----------|-------------------------------------------------------------------------------------------|
| CNVR_128 | 13 | 57303725 | 57458704 | Non-Genic                                                                                 |
| CNVR_500 | 7  | 1.1E+08  | 1.1E+08  | IMMP2L                                                                                    |
| CNVR_245 | 2  | 1.42E+08 | 1.42E+08 | LRP1B                                                                                     |
| CNVR_171 | 16 | 14897340 | 15013764 | MIR3179-1-3,MIR3180-1-3,LOC100288162,MIR6511A-2,MIR6770-2,MIR1972-1,2,NOMO1,NPIPA1,PDXDC1 |
| CNVR_509 | 7  | 1.42E+08 | 1.42E+08 | Non-Genic                                                                                 |
| CNVR_53  | 10 | 83876515 | 83935645 | NRG3                                                                                      |
| CNVR_28  | 1  | 1.84E+08 | 1.84E+08 | HMCN1                                                                                     |
| CNVR_132 | 13 | 68150996 | 68162686 | Non-Genic                                                                                 |
| CNVR_275 | 20 | 9162739  | 9260040  | PLCB4                                                                                     |
| CNVR_48  | 10 | 56849322 | 56850546 | Non-Genic                                                                                 |
| CNVR_8   | 1  | 72528701 | 72583736 | Non-Genic                                                                                 |
| CNVR_39  | 1  | 2.37E+08 | 2.37E+08 | Non-Genic                                                                                 |
| CNVR_452 | 6  | 51238911 | 51323765 | Non-Genic                                                                                 |
| CNVR_11  | 1  | 97343743 | 97493409 | DPYD,DPYD-AS1                                                                             |
| CNVR_380 | 4  | 92680388 | 92885265 | CCSER1                                                                                    |
| CNVR_331 | 3  | 1.2E+08  | 1.2E+08  | Non-Genic                                                                                 |
| CNVR_338 | 3  | 1.54E+08 | 1.54E+08 | Non-Genic                                                                                 |
| CNVR_527 | 8  | 39349340 | 39506122 | ADAM3A,ADAM5                                                                              |
| CNVR_382 | 4  | 94459846 | 94551400 | GRID2                                                                                     |
| CNVR_31  | 1  | 1.92E+08 | 1.92E+08 | Non-Genic                                                                                 |
| CNVR_552 | 9  | 23553421 | 23663382 | Non-Genic                                                                                 |
| CNVR_253 | 2  | 1.67E+08 | 1.67E+08 | XIRP2                                                                                     |
| CNVR_354 | 4  | 13712387 | 13714546 | Non-Genic                                                                                 |
| CNVR_125 | 13 | 53589768 | 53626276 | Non-Genic                                                                                 |
| CNVR_389 | 4  | 1.16E+08 | 1.16E+08 | NDST4                                                                                     |
| CNVR_530 | 8  | 63579217 | 63732132 | NKAIN3                                                                                    |
| CNVR_449 | 6  | 29948930 | 30029106 | HCG4B,HLA-A,HLA-H                                                                         |
| CNVR_170 | 16 | 8173425  | 8272874  | Non-Genic                                                                                 |
| CNVR_456 | 6  | 66166301 | 66186725 | EYS                                                                                       |
| CNVR_373 | 4  | 65917164 | 66020448 | EPHA5                                                                                     |
| CNVR_32  | 1  | 1.95E+08 | 1.95E+08 | KCNT2                                                                                     |
| CNVR_49  | 10 | 58179283 | 58206069 | Non-Genic                                                                                 |
| CNVR_286 | 22 | 21048635 | 21070490 | Non-Genic                                                                                 |
| CNVR_238 | 2  | 1.06E+08 | 1.06E+08 | Non-Genic                                                                                 |
| CNVR_565 | 9  | 1.2E+08  | 1.2E+08  | Non-Genic                                                                                 |
| CNVR_248 | 2  | 1.46E+08 | 1.46E+08 | Non-Genic                                                                                 |
| CNVR_348 | 3  | 1.93E+08 | 1.94E+08 | FGF12                                                                                     |
| CNVR_80  | 11 | 88016696 | 88130554 | GRM5                                                                                      |
| CNVR_69  | 11 | 30096711 | 30141702 | Non-Genic                                                                                 |
| CNVR_203 | 18 | 51959733 | 52007678 | Non-Genic                                                                                 |
| CNVR_368 | 4  | 42542587 | 42670649 | GRXCR1                                                                                    |

|          |    |          |          |                                            |
|----------|----|----------|----------|--------------------------------------------|
| CNVR_280 | 20 | 37376195 | 37537707 | Non-Genic                                  |
| CNVR_324 | 3  | 77943364 | 78111824 | Non-Genic                                  |
| CNVR_258 | 2  | 1.85E+08 | 1.85E+08 | Non-Genic                                  |
| CNVR_562 | 9  | 1.04E+08 | 1.04E+08 | Non-Genic                                  |
| CNVR_366 | 4  | 28859054 | 28920933 | Non-Genic                                  |
| CNVR_347 | 3  | 1.91E+08 | 1.91E+08 | TP63                                       |
| CNVR_131 | 13 | 65110021 | 65118928 | Non-Genic                                  |
| CNVR_553 | 9  | 29638921 | 29745125 | Non-Genic                                  |
| CNVR_436 | 5  | 1.44E+08 | 1.45E+08 | Non-Genic                                  |
| CNVR_111 | 12 | 74238449 | 74284870 | Non-Genic                                  |
| CNVR_114 | 12 | 85944878 | 85990284 | Non-Genic                                  |
| CNVR_106 | 12 | 41698809 | 41833110 | Non-Genic                                  |
| CNVR_559 | 9  | 77962279 | 78005218 | PCSK5                                      |
| CNVR_340 | 3  | 1.63E+08 | 1.63E+08 | Non-Genic                                  |
| CNVR_61  | 11 | 18905648 | 18918939 | MRGPRX1                                    |
| CNVR_512 | 8  | 3984471  | 3991699  | CSMD1                                      |
| CNVR_441 | 5  | 1.56E+08 | 1.56E+08 | SGCD                                       |
| CNVR_303 | 3  | 30348828 | 30393684 | Non-Genic                                  |
| CNVR_265 | 2  | 2.13E+08 | 2.13E+08 | ERBB4                                      |
| CNVR_99  | 12 | 29990659 | 30092681 | Non-Genic                                  |
| CNVR_13  | 1  | 1.02E+08 | 1.02E+08 | Non-Genic                                  |
| CNVR_491 | 7  | 46501886 | 46595634 | Non-Genic                                  |
| CNVR_526 | 8  | 36936693 | 36998013 | Non-Genic                                  |
| CNVR_517 | 8  | 14535607 | 14565222 | SGCZ                                       |
| CNVR_505 | 7  | 1.26E+08 | 1.26E+08 | GRM8                                       |
| CNVR_232 | 2  | 59213200 | 59373373 | Non-Genic                                  |
| CNVR_211 | 19 | 20388046 | 20508229 | ZNF826P                                    |
| CNVR_431 | 5  | 1.16E+08 | 1.16E+08 | COMMD10                                    |
| CNVR_273 | 20 | 7186994  | 7331634  | MIR8062                                    |
| CNVR_164 | 15 | 74678296 | 74682830 | SCAPER                                     |
| CNVR_222 | 2  | 16812538 | 16832397 | Non-Genic                                  |
| CNVR_499 | 7  | 1.09E+08 | 1.09E+08 | Non-Genic                                  |
| CNVR_445 | 5  | 1.69E+08 | 1.69E+08 | Non-Genic                                  |
| CNVR_548 | 9  | 9192872  | 9370781  | PTPRD                                      |
| CNVR_140 | 14 | 19227683 | 19493212 | OR4Q3,OR4M1,OR4K5,OR4K1,OR11H2,OR4N2,OR4K2 |
| CNVR_295 | 3  | 6626128  | 6628332  | Non-Genic                                  |
| CNVR_332 | 3  | 1.31E+08 | 1.31E+08 | ALG1L2                                     |
| CNVR_10  | 1  | 90602939 | 90805877 | Non-Genic                                  |
| CNVR_194 | 18 | 33746512 | 33816853 | Non-Genic                                  |
| CNVR_215 | 19 | 48394873 | 48448077 | LOC284344,PSG4                             |
| CNVR_26  | 1  | 1.7E+08  | 1.7E+08  | DNM3                                       |



|          |    |          |          |                   |
|----------|----|----------|----------|-------------------|
| CNVR_467 | 6  | 87119599 | 87218008 | Non-Genic         |
| CNVR_306 | 3  | 34245407 | 34388055 | Non-Genic         |
| CNVR_180 | 16 | 76929941 | 76942502 | WVOX              |
| CNVR_29  | 1  | 1.86E+08 | 1.86E+08 | Non-Genic         |
| CNVR_94  | 12 | 13682775 | 13768117 | GRIN2B            |
| CNVR_229 | 2  | 52607972 | 52635046 | Non-Genic         |
| CNVR_470 | 6  | 93205346 | 93350059 | Non-Genic         |
| CNVR_425 | 5  | 1.01E+08 | 1.01E+08 | Non-Genic         |
| CNVR_437 | 5  | 1.51E+08 | 1.51E+08 | Non-Genic         |
| CNVR_496 | 7  | 88423601 | 88430399 | ZNF804B           |
| CNVR_466 | 6  | 85204781 | 85276415 | Non-Genic         |
| CNVR_112 | 12 | 74321259 | 74329241 | Non-Genic         |
| CNVR_105 | 12 | 41543645 | 41650526 | Non-Genic         |
| CNVR_189 | 17 | 47327971 | 47482171 | CA10              |
| CNVR_95  | 12 | 26419168 | 26446997 | ITPR2             |
| CNVR_259 | 2  | 1.89E+08 | 1.89E+08 | Non-Genic         |
| CNVR_457 | 6  | 66456203 | 66460573 | EYS               |
| CNVR_365 | 4  | 28247468 | 28318531 | Non-Genic         |
| CNVR_42  | 10 | 19636901 | 19756832 | Non-Genic         |
| CNVR_66  | 11 | 25131608 | 25240338 | Non-Genic         |
| CNVR_351 | 4  | 9812560  | 9949584  | Non-Genic         |
| CNVR_274 | 20 | 8141308  | 8217704  | PLCB1             |
| CNVR_126 | 13 | 55139743 | 55174769 | Non-Genic         |
| CNVR_237 | 2  | 89632342 | 89912071 | Non-Genic         |
| CNVR_409 | 5  | 15771492 | 15773597 | FBXL7             |
| CNVR_399 | 4  | 1.5E+08  | 1.5E+08  | Non-Genic         |
| CNVR_157 | 15 | 22225844 | 22276386 | Non-Genic         |
| CNVR_325 | 3  | 99367641 | 99401227 | OR5H15            |
| CNVR_246 | 2  | 1.44E+08 | 1.44E+08 | ARHGAP15          |
| CNVR_30  | 1  | 1.92E+08 | 1.92E+08 | Non-Genic         |
| CNVR_233 | 2  | 67225555 | 67356932 | LOC644838         |
| CNVR_202 | 18 | 47913179 | 48083771 | Non-Genic         |
| CNVR_554 | 9  | 31423095 | 31576421 | Non-Genic         |
| CNVR_290 | 22 | 37693565 | 37705253 | APOBEC3A_B        |
| CNVR_390 | 4  | 1.19E+08 | 1.19E+08 | Non-Genic         |
| CNVR_55  | 10 | 1.1E+08  | 1.1E+08  | Non-Genic         |
| CNVR_359 | 4  | 19168772 | 19213820 | Non-Genic         |
| CNVR_163 | 15 | 54577995 | 54579415 | Non-Genic         |
| CNVR_113 | 12 | 82252960 | 82457614 | Non-Genic         |
| CNVR_221 | 2  | 13500735 | 13574710 | Non-Genic         |
| CNVR_74  | 11 | 55130608 | 55210152 | OR4P4,OR4S2,OR4C6 |

|          |    |          |          |                                                            |
|----------|----|----------|----------|------------------------------------------------------------|
| CNVR_424 | 5  | 1.01E+08 | 1.01E+08 | Non-Genic                                                  |
| CNVR_76  | 11 | 80438873 | 80563413 | Non-Genic                                                  |
| CNVR_525 | 8  | 36780115 | 36898000 | KCNU1                                                      |
| CNVR_518 | 8  | 16177750 | 16338419 | Non-Genic                                                  |
| CNVR_379 | 4  | 80715018 | 80788200 | LINC00989                                                  |
| CNVR_21  | 1  | 1.47E+08 | 1.48E+08 | NBPF23,LOC101929780                                        |
| CNVR_400 | 4  | 1.5E+08  | 1.5E+08  | Non-Genic                                                  |
| CNVR_266 | 2  | 2.13E+08 | 2.13E+08 | ERBB4                                                      |
| CNVR_485 | 7  | 9023619  | 9179513  | Non-Genic                                                  |
| CNVR_288 | 22 | 22613016 | 22726814 | GSTT2,GSTT2B,DDT,GSTT2,LOC391322,DDTL,GSTT1,GSTT P2,GSTTP1 |
| CNVR_41  | 10 | 19103564 | 19184715 | Non-Genic                                                  |
| CNVR_454 | 6  | 62553822 | 62643387 | KHDRBS2                                                    |
| CNVR_169 | 16 | 7700395  | 7871589  | RBFOX1                                                     |
| CNVR_333 | 3  | 1.38E+08 | 1.39E+08 | Non-Genic                                                  |
| CNVR_484 | 7  | 8502011  | 8563426  | NXPH1                                                      |
| CNVR_367 | 4  | 34462895 | 34501120 | Non-Genic                                                  |
| CNVR_504 | 7  | 1.24E+08 | 1.24E+08 | Non-Genic                                                  |
| CNVR_27  | 1  | 1.73E+08 | 1.73E+08 | RABGAP1L                                                   |
| CNVR_444 | 5  | 1.66E+08 | 1.66E+08 | Non-Genic                                                  |
| CNVR_6   | 1  | 58174538 | 58233385 | DAB1                                                       |
| CNVR_345 | 3  | 1.75E+08 | 1.75E+08 | NLGN1                                                      |
| CNVR_472 | 6  | 94766888 | 94906565 | Non-Genic                                                  |
| CNVR_298 | 3  | 18587522 | 18667097 | Non-Genic                                                  |
| CNVR_479 | 6  | 1.52E+08 | 1.52E+08 | ESR1                                                       |
| CNVR_547 | 9  | 8937937  | 8984349  | PTPRD                                                      |
| CNVR_313 | 3  | 59916832 | 60006571 | FHIT                                                       |
| CNVR_149 | 14 | 82020078 | 82074682 | Non-Genic                                                  |
| CNVR_12  | 1  | 97513711 | 97660902 | DPYD,DPYD-AS1                                              |
| CNVR_471 | 6  | 93630929 | 93635351 | Non-Genic                                                  |
| CNVR_430 | 5  | 1.14E+08 | 1.14E+08 | KCNN2                                                      |
| CNVR_285 | 22 | 20139185 | 20175355 | TMEM191C,PI4KAP2                                           |
| CNVR_139 | 13 | 1.08E+08 | 1.08E+08 | MYO16                                                      |
| CNVR_212 | 19 | 40541333 | 40553688 | FFAR3                                                      |
| CNVR_398 | 4  | 1.45E+08 | 1.45E+08 | GYPB                                                       |
| CNVR_524 | 8  | 34259121 | 34356534 | Non-Genic                                                  |
| CNVR_209 | 19 | 15641343 | 15660571 | CYP4F12                                                    |
| CNVR_168 | 15 | 93075077 | 93084371 | Non-Genic                                                  |
| CNVR_419 | 5  | 62764844 | 62766233 | Non-Genic                                                  |
| CNVR_488 | 7  | 14943958 | 15049586 | Non-Genic                                                  |
| CNVR_387 | 4  | 1.13E+08 | 1.13E+08 | Non-Genic                                                  |
| CNVR_284 | 21 | 23479938 | 23547586 | Non-Genic                                                  |

|          |    |          |          |                                                                    |
|----------|----|----------|----------|--------------------------------------------------------------------|
| CNVR_463 | 6  | 81340908 | 81346253 | Non-Genic                                                          |
| CNVR_541 | 8  | 1.35E+08 | 1.35E+08 | Non-Genic                                                          |
| CNVR_256 | 2  | 1.82E+08 | 1.82E+08 | CERKL,ITGA4                                                        |
| CNVR_116 | 12 | 91395375 | 91437111 | Non-Genic                                                          |
| CNVR_144 | 14 | 42291947 | 42454433 | Non-Genic                                                          |
| CNVR_24  | 1  | 1.61E+08 | 1.61E+08 | DDR2                                                               |
| CNVR_97  | 12 | 28429048 | 28604607 | CCDC91                                                             |
| CNVR_43  | 10 | 20505749 | 20556984 | PLXDC2                                                             |
| CNVR_4   | 1  | 56470844 | 56522954 | Non-Genic                                                          |
| CNVR_234 | 2  | 77049852 | 77118508 | LRRTM4                                                             |
| CNVR_334 | 3  | 1.41E+08 | 1.42E+08 | CLSTN2                                                             |
| CNVR_188 | 17 | 41521621 | 42120174 | KANSL1-<br>AS1,ARL17B,LRRC37A,ARL17A,LRRC37A2,KANSL1,NSFP1,<br>NSF |
| CNVR_376 | 4  | 69713484 | 69902857 | UGT2A3,UGT2B10                                                     |
| CNVR_408 | 5  | 12868780 | 12873076 | Non-Genic                                                          |
| CNVR_411 | 5  | 29059061 | 29090783 | Non-Genic                                                          |
| CNVR_282 | 21 | 22577635 | 22586529 | Non-Genic                                                          |
| CNVR_448 | 6  | 222360   | 324015   | DUSP22                                                             |
| CNVR_156 | 15 | 21606530 | 21610400 | Non-Genic                                                          |
| CNVR_217 | 19 | 59975655 | 60040503 | KIR2DL1,KIR2DL4,LOC100287534,KIR2DS4,KIR3DL1                       |
| CNVR_360 | 4  | 19396758 | 19525219 | Non-Genic                                                          |
| CNVR_510 | 7  | 1.42E+08 | 1.42E+08 | PRSS3P2                                                            |
| CNVR_34  | 1  | 1.98E+08 | 1.98E+08 | Non-Genic                                                          |
| CNVR_316 | 3  | 63485004 | 63496596 | SYNPR,SYNPR-AS1                                                    |
| CNVR_89  | 12 | 2116123  | 2128181  | CACNA1C                                                            |
| CNVR_540 | 8  | 1.35E+08 | 1.35E+08 | Non-Genic                                                          |
| CNVR_196 | 18 | 36514418 | 36519387 | Non-Genic                                                          |
| CNVR_200 | 18 | 38738369 | 38849340 | RIT2                                                               |
| CNVR_120 | 13 | 31430622 | 31436423 | EEF1DP3                                                            |
| CNVR_162 | 15 | 44813144 | 44958601 | MIR548A3                                                           |
| CNVR_197 | 18 | 36899387 | 36964001 | Non-Genic                                                          |
| CNVR_81  | 11 | 94915458 | 94960751 | Non-Genic                                                          |
| CNVR_481 | 6  | 1.68E+08 | 1.68E+08 | FRMD1,KIF25                                                        |
| CNVR_300 | 3  | 22048394 | 22139233 | Non-Genic                                                          |
| CNVR_508 | 7  | 1.41E+08 | 1.41E+08 | MGAM                                                               |
| CNVR_542 | 8  | 1.38E+08 | 1.38E+08 | Non-Genic                                                          |
| CNVR_386 | 4  | 1.05E+08 | 1.05E+08 | Non-Genic                                                          |
| CNVR_40  | 10 | 8737326  | 8770636  | Non-Genic                                                          |
| CNVR_292 | 3  | 98317    | 98526    | Non-Genic                                                          |
| CNVR_50  | 10 | 59367027 | 59442553 | Non-Genic                                                          |
| CNVR_213 | 19 | 47986230 | 48335218 | PSG7,LOC100289650,PSG1,PSG10P,PSG11,PSG2,PSG6                      |

|          |    |          |          |                  |
|----------|----|----------|----------|------------------|
| CNVR_279 | 20 | 15259370 | 15265978 | MACROD2          |
| CNVR_314 | 3  | 62457592 | 62509509 | CADPS            |
| CNVR_560 | 9  | 82735266 | 82784881 | Non-Genic        |
| CNVR_147 | 14 | 65776943 | 65841362 | Non-Genic        |
| CNVR_278 | 20 | 12949715 | 13091562 | SPTLC3           |
| CNVR_267 | 2  | 2.15E+08 | 2.15E+08 | SPAG16           |
| CNVR_336 | 3  | 1.46E+08 | 1.46E+08 | Non-Genic        |
| CNVR_523 | 8  | 32988821 | 33112493 | MIR548AD         |
| CNVR_352 | 4  | 10001452 | 10009766 | Non-Genic        |
| CNVR_438 | 5  | 1.55E+08 | 1.55E+08 | Non-Genic        |
| CNVR_152 | 14 | 84574981 | 84727510 | Non-Genic        |
| CNVR_557 | 9  | 71287475 | 71306626 | APBA1            |
| CNVR_297 | 3  | 7743672  | 7942629  | GRM7             |
| CNVR_175 | 16 | 32274359 | 32563024 | Non-Genic        |
| CNVR_249 | 2  | 1.47E+08 | 1.47E+08 | Non-Genic        |
| CNVR_77  | 11 | 80946633 | 80947480 | Non-Genic        |
| CNVR_83  | 11 | 1E+08    | 1E+08    | MIR548G,ARHGAP42 |
| CNVR_326 | 3  | 1E+08    | 1E+08    | Non-Genic        |
| CNVR_242 | 2  | 1.24E+08 | 1.24E+08 | Non-Genic        |
| CNVR_261 | 2  | 1.99E+08 | 1.99E+08 | PLCL1            |
| CNVR_493 | 7  | 76312337 | 76388137 | Non-Genic        |
| CNVR_75  | 11 | 80248176 | 80370189 | Non-Genic        |
| CNVR_473 | 6  | 1.02E+08 | 1.03E+08 | GRIK2            |
| CNVR_178 | 16 | 58193938 | 58276258 | Non-Genic        |
| CNVR_271 | 20 | 1509580  | 1541893  | SIRPB1           |
| CNVR_458 | 6  | 67575994 | 67632535 | Non-Genic        |
| CNVR_190 | 17 | 47873838 | 48087393 | Non-Genic        |
| CNVR_138 | 13 | 1.08E+08 | 1.08E+08 | MYO16            |
| CNVR_443 | 5  | 1.66E+08 | 1.66E+08 | Non-Genic        |
| CNVR_551 | 9  | 13700067 | 13794580 | Non-Genic        |
| CNVR_208 | 18 | 67120049 | 67283060 | Non-Genic        |
| CNVR_244 | 2  | 1.41E+08 | 1.42E+08 | LRP1B            |
| CNVR_451 | 6  | 38944739 | 38946815 | DNAH8            |
| CNVR_558 | 9  | 75489452 | 75614055 | Non-Genic        |
| CNVR_489 | 7  | 17456985 | 17534983 | Non-Genic        |
| CNVR_519 | 8  | 20542037 | 20570765 | Non-Genic        |
| CNVR_25  | 1  | 1.65E+08 | 1.65E+08 | FMO9P            |
| CNVR_538 | 8  | 1.16E+08 | 1.16E+08 | Non-Genic        |
| CNVR_515 | 8  | 13597976 | 13696093 | Non-Genic        |
| CNVR_407 | 5  | 751371   | 878653   | ZDHC11           |
| CNVR_167 | 15 | 91608389 | 91621304 | Non-Genic        |

|          |    |          |          |                                       |
|----------|----|----------|----------|---------------------------------------|
| CNVR_79  | 11 | 87211599 | 87347354 | Non-Genic                             |
| CNVR_315 | 3  | 63387276 | 63477266 | SYNPR,SYNPR-AS1                       |
| CNVR_311 | 3  | 53003415 | 53014257 | SFMBT1                                |
| CNVR_381 | 4  | 93628942 | 93709753 | GRID2                                 |
| CNVR_440 | 5  | 1.55E+08 | 1.55E+08 | Non-Genic                             |
| CNVR_148 | 14 | 71596962 | 71680672 | RGS6                                  |
| CNVR_223 | 2  | 21750697 | 21928934 | LOC645949                             |
| CNVR_187 | 17 | 36766982 | 36776021 | KRT33B                                |
| CNVR_68  | 11 | 25663542 | 25675557 | Non-Genic                             |
| CNVR_177 | 16 | 54353890 | 54379945 | CES1P1                                |
| CNVR_511 | 7  | 1.55E+08 | 1.55E+08 | Non-Genic                             |
| CNVR_224 | 2  | 24460486 | 24464632 | Non-Genic                             |
| CNVR_563 | 9  | 1.05E+08 | 1.05E+08 | Non-Genic                             |
| CNVR_33  | 1  | 1.95E+08 | 1.95E+08 | CFHR3,CFHR1,CFHR4                     |
| CNVR_161 | 15 | 35245649 | 35342552 | Non-Genic                             |
| CNVR_36  | 1  | 2.15E+08 | 2.15E+08 | ESRRG                                 |
| CNVR_439 | 5  | 1.55E+08 | 1.55E+08 | Non-Genic                             |
| CNVR_335 | 3  | 1.45E+08 | 1.46E+08 | Non-Genic                             |
| CNVR_151 | 14 | 83213340 | 83364474 | Non-Genic                             |
| CNVR_15  | 1  | 1.06E+08 | 1.06E+08 | Non-Genic                             |
| CNVR_391 | 4  | 1.23E+08 | 1.23E+08 | QRFPR                                 |
| CNVR_14  | 1  | 1.04E+08 | 1.04E+08 | ACTG1P4,AMY2A,AMY2B,AMY1A,AMY1B,AMY1C |
| CNVR_130 | 13 | 65094530 | 65106602 | Non-Genic                             |
| CNVR_268 | 2  | 2.22E+08 | 2.22E+08 | Non-Genic                             |
| CNVR_143 | 14 | 36402878 | 36439609 | SLC25A21                              |
| CNVR_9   | 1  | 74144096 | 74218172 | Non-Genic                             |
| CNVR_155 | 15 | 19764921 | 20089383 | OR4M2,OR4N4,OR4N3P,LOC727924,REREP3   |
| CNVR_283 | 21 | 23351419 | 23355927 | Non-Genic                             |
| CNVR_369 | 4  | 59662156 | 59696608 | Non-Genic                             |
| CNVR_236 | 2  | 88914239 | 89189769 | Non-Genic                             |
| CNVR_532 | 8  | 79088587 | 79255302 | Non-Genic                             |
| CNVR_206 | 18 | 63110187 | 63118245 | Non-Genic                             |
| CNVR_490 | 7  | 31809999 | 31983667 | PDE1C                                 |
| CNVR_98  | 12 | 28885160 | 28915801 | Non-Genic                             |
| CNVR_498 | 7  | 1.08E+08 | 1.09E+08 | Non-Genic                             |
| CNVR_422 | 5  | 83222082 | 83335815 | EDIL3                                 |
| CNVR_429 | 5  | 1.1E+08  | 1.1E+08  | Non-Genic                             |
| CNVR_549 | 9  | 11931913 | 11948106 | Non-Genic                             |
| CNVR_1   | 1  | 25465715 | 25519573 | RHD                                   |
| CNVR_474 | 6  | 1.04E+08 | 1.04E+08 | Non-Genic                             |
| CNVR_272 | 20 | 6455559  | 6562991  | Non-Genic                             |

|          |    |          |          |                    |
|----------|----|----------|----------|--------------------|
| CNVR_291 | 22 | 41227226 | 41280435 | SERHL,RRP7A,SERHL2 |
| CNVR_410 | 5  | 20535921 | 20606744 | Non-Genic          |
| CNVR_3   | 1  | 55731828 | 55763020 | Non-Genic          |
| CNVR_210 | 19 | 15661729 | 15685943 | CYP4F12            |
| CNVR_251 | 2  | 1.51E+08 | 1.52E+08 | Non-Genic          |
| CNVR_305 | 3  | 30711780 | 30833631 | GADL1              |
| CNVR_459 | 6  | 74648953 | 74658138 | Non-Genic          |
| CNVR_357 | 4  | 18476305 | 18552811 | Non-Genic          |
| CNVR_385 | 4  | 1.04E+08 | 1.04E+08 | Non-Genic          |
| CNVR_235 | 2  | 78543001 | 78575410 | Non-Genic          |
| CNVR_137 | 13 | 1.03E+08 | 1.03E+08 | MIR548AS           |
| CNVR_195 | 18 | 34194091 | 34356944 | Non-Genic          |
| CNVR_82  | 11 | 99438533 | 99586799 | CNTN5              |
| CNVR_423 | 5  | 90853657 | 91039700 | Non-Genic          |
| CNVR_136 | 13 | 93202489 | 93326700 | GPC6-AS2,GPC6      |
| CNVR_184 | 17 | 19440328 | 19478062 | Non-Genic          |
| CNVR_230 | 2  | 53141525 | 53289795 | Non-Genic          |
| CNVR_186 | 17 | 36675211 | 36684057 | KRTAP9-6           |
| CNVR_294 | 3  | 5633413  | 5748145  | Non-Genic          |
| CNVR_442 | 5  | 1.63E+08 | 1.63E+08 | Non-Genic          |
| CNVR_475 | 6  | 1.29E+08 | 1.29E+08 | PTPRK              |
| CNVR_250 | 2  | 1.51E+08 | 1.51E+08 | Non-Genic          |
| CNVR_561 | 9  | 1.04E+08 | 1.04E+08 | Non-Genic          |
| CNVR_341 | 3  | 1.63E+08 | 1.63E+08 | Non-Genic          |
| CNVR_52  | 10 | 83758325 | 83799382 | NRG3               |
| CNVR_318 | 3  | 64279206 | 64362799 | Non-Genic          |
| CNVR_277 | 20 | 12077939 | 12204779 | Non-Genic          |
| CNVR_502 | 7  | 1.18E+08 | 1.18E+08 | Non-Genic          |
| CNVR_299 | 3  | 21843427 | 21904234 | Non-Genic          |
| CNVR_192 | 17 | 66303350 | 66481942 | Non-Genic          |
| CNVR_227 | 2  | 49322295 | 49406398 | Non-Genic          |
| CNVR_133 | 13 | 71466141 | 71577801 | Non-Genic          |
| CNVR_395 | 4  | 1.38E+08 | 1.38E+08 | Non-Genic          |
| CNVR_533 | 8  | 79952880 | 80018924 | Non-Genic          |
| CNVR_199 | 18 | 38169747 | 38388326 | LINC00907          |
| CNVR_506 | 7  | 1.33E+08 | 1.33E+08 | Non-Genic          |
| CNVR_91  | 12 | 8449755  | 8475939  | Non-Genic          |
| CNVR_129 | 13 | 64202016 | 64293607 | Non-Genic          |
| CNVR_65  | 11 | 21486828 | 21605232 | NELL1              |
| CNVR_370 | 4  | 62542106 | 62807317 | LPHN3              |
| CNVR_344 | 3  | 1.67E+08 | 1.67E+08 | Non-Genic          |

|          |    |          |          |                             |
|----------|----|----------|----------|-----------------------------|
| CNVR_417 | 5  | 57992583 | 57994889 | RAB3C                       |
| CNVR_495 | 7  | 83992228 | 84130820 | Non-Genic                   |
| CNVR_476 | 6  | 1.3E+08  | 1.3E+08  | LAMA2,ARHGAP18              |
| CNVR_58  | 11 | 4924226  | 4933658  | OR51A4,OR51A2               |
| CNVR_312 | 3  | 59692188 | 59727070 | FHIT                        |
| CNVR_469 | 6  | 91532929 | 91634535 | Non-Genic                   |
| CNVR_521 | 8  | 25030360 | 25040250 | Non-Genic                   |
| CNVR_7   | 1  | 70197030 | 70297470 | LRRC7                       |
| CNVR_405 | 4  | 1.73E+08 | 1.73E+08 | Non-Genic                   |
| CNVR_362 | 4  | 20981101 | 20985949 | KCNIP4                      |
| CNVR_207 | 18 | 64847351 | 64904306 | CCDC102B                    |
| CNVR_123 | 13 | 37185007 | 37262933 | TRPC4                       |
| CNVR_38  | 1  | 2.17E+08 | 2.17E+08 | LOC643723                   |
| CNVR_173 | 16 | 21319904 | 21501135 | SLC7A5P2,NPIP3,LOC100271836 |
| CNVR_329 | 3  | 1.04E+08 | 1.04E+08 | Non-Genic                   |
| CNVR_101 | 12 | 33180225 | 33203464 | Non-Genic                   |
| CNVR_72  | 11 | 38414524 | 38419763 | Non-Genic                   |
| CNVR_240 | 2  | 1.17E+08 | 1.17E+08 | Non-Genic                   |
| CNVR_412 | 5  | 44131960 | 44390890 | FGF10                       |
| CNVR_85  | 11 | 1.04E+08 | 1.04E+08 | CARD17                      |
| CNVR_350 | 4  | 8979788  | 9066075  | USP17L6P,DEFB131            |
| CNVR_544 | 8  | 1.4E+08  | 1.4E+08  | Non-Genic                   |
| CNVR_63  | 11 | 21143571 | 21205419 | NELL1                       |
| CNVR_165 | 15 | 85101125 | 85222377 | AGBL1                       |
| CNVR_406 | 4  | 1.79E+08 | 1.79E+08 | LINC01098                   |
| CNVR_87  | 11 | 1.24E+08 | 1.24E+08 | Non-Genic                   |
| CNVR_566 | 9  | 1.2E+08  | 1.2E+08  | Non-Genic                   |
| CNVR_115 | 12 | 89004082 | 89117120 | Non-Genic                   |
| CNVR_219 | 2  | 6215763  | 6225326  | Non-Genic                   |
| CNVR_307 | 3  | 34578323 | 34628739 | Non-Genic                   |
| CNVR_118 | 12 | 1.13E+08 | 1.13E+08 | Non-Genic                   |
| CNVR_453 | 6  | 54308667 | 54482248 | TINAG                       |
| CNVR_59  | 11 | 5739501  | 5810219  | OR52N1,OR52N5,OR52N2        |
| CNVR_378 | 4  | 72615741 | 72702475 | SLC4A4                      |
| CNVR_145 | 14 | 43570867 | 43662409 | Non-Genic                   |
| CNVR_337 | 3  | 1.49E+08 | 1.49E+08 | Non-Genic                   |
| CNVR_483 | 7  | 3381423  | 3418715  | SDK1                        |
| CNVR_17  | 1  | 1.08E+08 | 1.08E+08 | VAV3                        |
| CNVR_358 | 4  | 18677873 | 18775940 | Non-Genic                   |
| CNVR_44  | 10 | 20922405 | 21035317 | Non-Genic                   |
| CNVR_486 | 7  | 11256406 | 11308516 | Non-Genic                   |

|          |    |          |          |                               |
|----------|----|----------|----------|-------------------------------|
| CNVR_501 | 7  | 1.14E+08 | 1.14E+08 | Non-Genic                     |
| CNVR_289 | 22 | 23993985 | 24248709 | IGLL3P,MIR6817,LRP5L,CRYBB2P1 |
| CNVR_322 | 3  | 70867684 | 71014006 | Non-Genic                     |
| CNVR_176 | 16 | 33208395 | 33555980 | RNU6-76P                      |
| CNVR_100 | 12 | 30130534 | 30134989 | Non-Genic                     |
| CNVR_403 | 4  | 1.62E+08 | 1.62E+08 | Non-Genic                     |
| CNVR_216 | 19 | 56834164 | 56840009 | SIGLEC14                      |
| CNVR_185 | 17 | 31464091 | 31509204 | Non-Genic                     |
| CNVR_435 | 5  | 1.44E+08 | 1.44E+08 | Non-Genic                     |
| CNVR_492 | 7  | 48570725 | 48585686 | ABCA13                        |
| CNVR_293 | 3  | 930813   | 1007142  | Non-Genic                     |
| CNVR_73  | 11 | 49279587 | 49317264 | Non-Genic                     |
| CNVR_257 | 2  | 1.85E+08 | 1.85E+08 | Non-Genic                     |
| CNVR_16  | 1  | 1.07E+08 | 1.07E+08 | Non-Genic                     |
| CNVR_281 | 20 | 37761688 | 37869101 | Non-Genic                     |
| CNVR_321 | 3  | 68504082 | 68630961 | FAM19A1                       |
| CNVR_428 | 5  | 1.1E+08  | 1.1E+08  | Non-Genic                     |
| CNVR_531 | 8  | 77816500 | 78003228 | ZFH4                          |
| CNVR_90  | 12 | 7905081  | 8010135  | SLC2A3,SLC2A14                |
| CNVR_462 | 6  | 79025784 | 79116741 | Non-Genic                     |
| CNVR_371 | 4  | 64375574 | 64390818 | Non-Genic                     |
| CNVR_218 | 2  | 4191739  | 4201042  | Non-Genic                     |
| CNVR_51  | 10 | 66977929 | 66984452 | Non-Genic                     |
| CNVR_355 | 4  | 13722031 | 13895351 | LINC01085                     |
| CNVR_421 | 5  | 73338237 | 73445948 | Non-Genic                     |
| CNVR_361 | 4  | 20164818 | 20196278 | SLIT2                         |
| CNVR_477 | 6  | 1.33E+08 | 1.33E+08 | TAAR5,TAAR3,TAAR2             |
| CNVR_418 | 5  | 58571441 | 58625543 | PDE4D                         |
| CNVR_539 | 8  | 1.3E+08  | 1.3E+08  | Non-Genic                     |
| CNVR_134 | 13 | 75007537 | 75015769 | COMMD6                        |
| CNVR_342 | 3  | 1.64E+08 | 1.64E+08 | Non-Genic                     |
| CNVR_534 | 8  | 85406374 | 85456374 | RALYL                         |
| CNVR_96  | 12 | 27539008 | 27542629 | SMCO2                         |
| CNVR_349 | 3  | 1.94E+08 | 1.94E+08 | Non-Genic                     |
| CNVR_183 | 17 | 18296117 | 18367186 | USP32P2,LGALS9C               |
| CNVR_142 | 14 | 32165589 | 32278520 | AKAP6                         |
| CNVR_150 | 14 | 82847656 | 83013970 | Non-Genic                     |
| CNVR_392 | 4  | 1.25E+08 | 1.25E+08 | Non-Genic                     |
| CNVR_2   | 1  | 34875241 | 34877078 | Non-Genic                     |
| CNVR_375 | 4  | 69043083 | 69188929 | TMPRSS11E,UGT2B17             |
| CNVR_252 | 2  | 1.52E+08 | 1.52E+08 | NEB                           |



|          |    |          |          |                                     |
|----------|----|----------|----------|-------------------------------------|
| CNVR_420 | 5  | 66746319 | 66848896 | Non-Genic                           |
| CNVR_102 | 12 | 36339406 | 36473016 | Non-Genic                           |
| CNVR_45  | 10 | 24149834 | 24252491 | KIAA1217                            |
| CNVR_117 | 12 | 98319424 | 98322865 | ANKS1B                              |
| CNVR_191 | 17 | 49534732 | 49884231 | MIR548AJ2                           |
| CNVR_37  | 1  | 2.16E+08 | 2.16E+08 | SPATA17                             |
| CNVR_550 | 9  | 11957011 | 11965492 | Non-Genic                           |
| CNVR_388 | 4  | 1.15E+08 | 1.15E+08 | Non-Genic                           |
| CNVR_35  | 1  | 2.14E+08 | 2.14E+08 | Non-Genic                           |
| CNVR_225 | 2  | 34552819 | 34590561 | Non-Genic                           |
| CNVR_46  | 10 | 47011195 | 47174643 | ANTXRL,ANTXRLP1                     |
| CNVR_320 | 3  | 65151156 | 65213409 | Non-Genic                           |
| CNVR_543 | 8  | 1.38E+08 | 1.39E+08 | Non-Genic                           |
| CNVR_254 | 2  | 1.79E+08 | 1.79E+08 | CCDC141,TTN                         |
| CNVR_88  | 12 | 739370   | 744290   | WNK1                                |
| CNVR_93  | 12 | 11402844 | 11434653 | Non-Genic                           |
| CNVR_198 | 18 | 38120204 | 38132158 | LINC00907                           |
| CNVR_260 | 2  | 1.93E+08 | 1.93E+08 | TMEFF2                              |
| CNVR_383 | 4  | 97924174 | 98039314 | Non-Genic                           |
| CNVR_201 | 18 | 39108271 | 39229064 | SYT4                                |
| CNVR_62  | 11 | 20977136 | 21062948 | NELL1                               |
| CNVR_308 | 3  | 36115876 | 36262332 | Non-Genic                           |
| CNVR_450 | 6  | 32562253 | 32678343 | HLA-DRB6,HLA-DRB1,HLA-DRB5          |
| CNVR_480 | 6  | 1.68E+08 | 1.68E+08 | Non-Genic                           |
| CNVR_204 | 18 | 56954529 | 57081213 | Non-Genic                           |
| CNVR_262 | 2  | 2.03E+08 | 2.03E+08 | BMPR2                               |
| CNVR_317 | 3  | 63501100 | 63502905 | SYNPR,SYNPR-AS1                     |
| CNVR_160 | 15 | 32507087 | 32618236 | MIR1233-1,MIR1233-2,GOLGA8B,GOLGA8A |
| CNVR_319 | 3  | 64902065 | 64959530 | ADAMTS9-AS2                         |
| CNVR_507 | 7  | 1.36E+08 | 1.36E+08 | Non-Genic                           |
| CNVR_146 | 14 | 53201287 | 53352059 | Non-Genic                           |
| CNVR_84  | 11 | 1.04E+08 | 1.04E+08 | CASP12                              |
| CNVR_328 | 3  | 1.04E+08 | 1.04E+08 | Non-Genic                           |
| CNVR_243 | 2  | 1.25E+08 | 1.25E+08 | CNTNAP5                             |
| CNVR_404 | 4  | 1.67E+08 | 1.67E+08 | TLL1                                |
| CNVR_109 | 12 | 65304434 | 65478528 | GRIP1                               |
| CNVR_22  | 1  | 1.51E+08 | 1.51E+08 | LCE3C,LCE3B                         |
| CNVR_537 | 8  | 1.07E+08 | 1.08E+08 | OXR1                                |
| CNVR_516 | 8  | 13843303 | 13906795 | Non-Genic                           |

**Supplementary Table 4:** Confusion matrix computed using random forest shows error rate in sample classification.

| Call: randomForest (formula = Population ~ . data = data<br>ntree = 50000, proximity = TRUE importance = T);<br>Type of random forest: classification;<br>Number of trees: 50000;<br>No. of variables tried at each split: 23;<br>OOB estimate of error rate: 19.08% |     |         |          |          |          |          |     |         |     |             |
|----------------------------------------------------------------------------------------------------------------------------------------------------------------------------------------------------------------------------------------------------------------------|-----|---------|----------|----------|----------|----------|-----|---------|-----|-------------|
| Confusion matrix:                                                                                                                                                                                                                                                    |     |         |          |          |          |          |     |         |     |             |
| Original\Predicted                                                                                                                                                                                                                                                   | CEU | IE-W-LP | IE-N-LP1 | IE-N-LP9 | IE-W-LP3 | IE-W-LP4 | LWK | OG-W-IP | YRI | class.error |
| CEU                                                                                                                                                                                                                                                                  | 24  | 0       | 0        | 0        | 0        | 0        | 1   | 0       | 0   | 0.04        |
| IE-W-LP                                                                                                                                                                                                                                                              | 0   | 28      | 0        | 0        | 0        | 0        | 0   | 0       | 0   | 0           |
| IE-N-LP1                                                                                                                                                                                                                                                             | 0   | 3       | 4        | 1        | 1        | 0        | 0   | 0       | 0   | 0.5555556   |
| IE-N-LP9                                                                                                                                                                                                                                                             | 0   | 2       | 1        | 3        | 3        | 0        | 0   | 0       | 0   | 0.6666667   |
| IE-W-LP3                                                                                                                                                                                                                                                             | 0   | 2       | 1        | 3        | 1        | 0        | 0   | 0       | 0   | 0.8571429   |
| IE-W-LP4                                                                                                                                                                                                                                                             | 0   | 5       | 0        | 0        | 0        | 3        | 0   | 1       | 0   | 0.6666667   |
| LWK                                                                                                                                                                                                                                                                  | 0   | 0       | 0        | 0        | 0        | 0        | 24  | 0       | 1   | 0.04        |
| OG-W-IP                                                                                                                                                                                                                                                              | 0   | 0       | 0        | 0        | 0        | 2        | 0   | 13      | 0   | 0.1333333   |
| YRI                                                                                                                                                                                                                                                                  | 0   | 0       | 0        | 0        | 0        | 0        | 2   | 0       | 23  | 0.08        |

**Supplementary Table 5:** Individual-wise membership proportions estimated by STRUCTURE for OG population using CNVR dataset.

| Estimated ancestry proportions of OG individuals using CNVRs |           |           |          |                |               |                |
|--------------------------------------------------------------|-----------|-----------|----------|----------------|---------------|----------------|
| (a.) K=2                                                     |           |           | (b.) K=3 |                |               |                |
| Samples                                                      | Cluster 1 | Cluster 2 | Samples  | Cluster 1 (OG) | Cluster2 (IE) | Cluster3 (AFR) |
| OG-W-IP                                                      | 0.278     | 0.722     | OG-W-IP  | 0.75           | 0.25          | 0.00           |
| OG-W-IP                                                      | 0.395     | 0.605     | OG-W-IP  | 0.65           | 0.31          | 0.04           |
| OG-W-IP                                                      | 0.005     | 0.995     | OG-W-IP  | 1.00           | 0.00          | 0.00           |
| OG-W-IP                                                      | 0.292     | 0.708     | OG-W-IP  | 0.74           | 0.26          | 0.00           |
| OG-W-IP                                                      | 0.546     | 0.454     | OG-W-IP  | 0.48           | 0.51          | 0.00           |
| OG-W-IP                                                      | 0.16      | 0.84      | OG-W-IP  | 0.88           | 0.11          | 0.01           |

|            |             |             |            |             |             |             |
|------------|-------------|-------------|------------|-------------|-------------|-------------|
| OG-W-IP    | 0.004       | 0.996       | OG-W-IP    | 1.00        | 0.00        | 0.00        |
| OG-W-IP    | 0.004       | 0.996       | OG-W-IP    | 1.00        | 0.00        | 0.00        |
| OG-W-IP    | 0.009       | 0.991       | OG-W-IP    | 1.00        | 0.00        | 0.00        |
| OG-W-IP    | 0.689       | 0.311       | OG-W-IP    | 0.33        | 0.37        | 0.30        |
| OG-W-IP    | 0.364       | 0.636       | OG-W-IP    | 0.68        | 0.23        | 0.09        |
| OG-W-IP    | 0.982       | 0.018       | OG-W-IP    | 0.02        | 0.68        | 0.30        |
| OG-W-IP    | 0.115       | 0.885       | OG-W-IP    | 0.95        | 0.04        | 0.02        |
| OG-W-IP    | 0.044       | 0.956       | OG-W-IP    | 0.99        | 0.01        | 0.00        |
| OG-W-IP    | 0.001       | 0.999       | OG-W-IP    | 1.00        | 0.00        | 0.00        |
| Membership |             |             | Membership |             |             |             |
| Proportion | <b>0.25</b> | <b>0.74</b> | Proportion | <b>0.76</b> | <b>0.18</b> | <b>0.05</b> |

- **IE** denotes Indo-European
- **AFR** denotes Africa

**Supplementary Table 6:** Individual-wise membership proportions estimated by STRUCTURE for OG population using SNPs within CNV boundaries.

| Estimated ancestry proportions of OG individuals using SNPs within CNVs |                |                 |                              |                |                 |                |
|-------------------------------------------------------------------------|----------------|-----------------|------------------------------|----------------|-----------------|----------------|
| (a.) K=2                                                                |                |                 | (b.) K=3                     |                |                 |                |
| Sample                                                                  | Cluster 1 (IE) | Cluster 2 (AFR) | Sample                       | Cluster 1 (IE) | Cluster 2 (AFR) | Cluster 3 (OG) |
| OG-W-IP                                                                 | 0.638          | 0.362           | OG-W-IP                      | 0.38           | 0.18            | 0.44           |
| OG-W-IP                                                                 | 0.623          | 0.377           | OG-W-IP                      | 0.35           | 0.21            | 0.44           |
| OG-W-IP                                                                 | 0.608          | 0.392           | OG-W-IP                      | 0.35           | 0.21            | 0.44           |
| OG-W-IP                                                                 | 0.621          | 0.379           | OG-W-IP                      | 0.33           | 0.19            | 0.49           |
| OG-W-IP                                                                 | 0.561          | 0.439           | OG-W-IP                      | 0.26           | 0.25            | 0.49           |
| OG-W-IP                                                                 | 0.608          | 0.392           | OG-W-IP                      | 0.31           | 0.16            | 0.53           |
| OG-W-IP                                                                 | 0.672          | 0.328           | OG-W-IP                      | 0.39           | 0.14            | 0.47           |
| OG-W-IP                                                                 | 0.632          | 0.368           | OG-W-IP                      | 0.36           | 0.17            | 0.47           |
| OG-W-IP                                                                 | 0.629          | 0.371           | OG-W-IP                      | 0.32           | 0.16            | 0.51           |
| OG-W-IP                                                                 | 0.492          | 0.508           | OG-W-IP                      | 0.25           | 0.35            | 0.40           |
| OG-W-IP                                                                 | 0.617          | 0.383           | OG-W-IP                      | 0.34           | 0.19            | 0.47           |
| OG-W-IP                                                                 | 0.545          | 0.455           | OG-W-IP                      | 0.37           | 0.34            | 0.29           |
| OG-W-IP                                                                 | 0.569          | 0.431           | OG-W-IP                      | 0.26           | 0.23            | 0.51           |
| OG-W-IP                                                                 | 0.757          | 0.243           | OG-W-IP                      | 0.50           | 0.04            | 0.47           |
| OG-W-IP                                                                 | 0.653          | 0.347           | OG-W-IP                      | 0.37           | 0.13            | 0.50           |
| <b>Membership proportions</b>                                           | <b>0.61</b>    | <b>0.38</b>     | <b>Membership Proportion</b> | <b>0.34</b>    | <b>0.20</b>     | <b>0.46</b>    |

**Supplementary Table 7: Association of OG specific genes in enriched molecular processes with various diseases/traits.**

| <b>GWAS</b>  |                                           |
|--------------|-------------------------------------------|
| <b>Genes</b> | <b>Disease/Trait</b>                      |
| CADPS        | Breast size                               |
| CLSTN2       | Multiple sclerosis (OCB status)           |
| FREM2        | Cytomegalovirus antibody response         |
| HMCN1        | QRS duration                              |
| ITPR2        | Renal cell carcinoma                      |
| NRXN1        | Metabolite levels (HVA/MHPG ratio)        |
| PLCB4        | Neutrophil count                          |
| PLCL1        | Prostate cancer (gene x gene interaction) |
| PPP3CA       | Corneal structure                         |
| TTN          | Breast size                               |
| <b>OMIM</b>  |                                           |
| <b>Genes</b> | <b>Disease</b>                            |
| EYS          | Retinitis pigmentosa 25                   |
| FREM2        | Fraser syndrome                           |
| HMCN1        | Macular degeneration                      |
| NRXN1        | Pitt-Hopkins-like syndrome 2              |
| PLCB4        | Auriculocondylar syndrome 2               |
| TTN          | Cardiomyopathy                            |
